# Supplementary material for: Single-cell RNA-sequencing of herpes simplex virus 1-infected cells connects NRF2 activation to an antiviral program
Source: PubMed Central journal article supplement (PMC6814756; doi:10.1038/s41467-019-12894-z), 2019-10-25
Supplement: 41467_2019_12894_MOESM4_ESM.pdf [file 41467_2019_12894_MOESM4_ESM.pdf]

## **Description of Additional Supplementary Files**

File Name: Supplementary Data 1

Description: Highly variable genes omitted and/or flagged in downstream analyses.

File Name: Supplementary Data 2

Description: Total nUMIs, raw viral read count, normalized viral read count for cells with more than 2000 detected genes.

File Name: Supplementary Data 3

Description: Correlation of host genes with viral transcription

File Name: Supplementary Data 4

Description: Sequence of the reporter plasmid insert, codon-optimized sequences used for the UL23/UL50/UL33/US2 expression plasmids.
